# Supplementary material for: Tidal Effects on the Schumann Resonance Amplitudes Recorded by the Global Coherence Monitoring System
Source: MDPI journal article supplement (doi:10.3390/app14083332), 2024-04-15
Supplement: s1 [file s1]

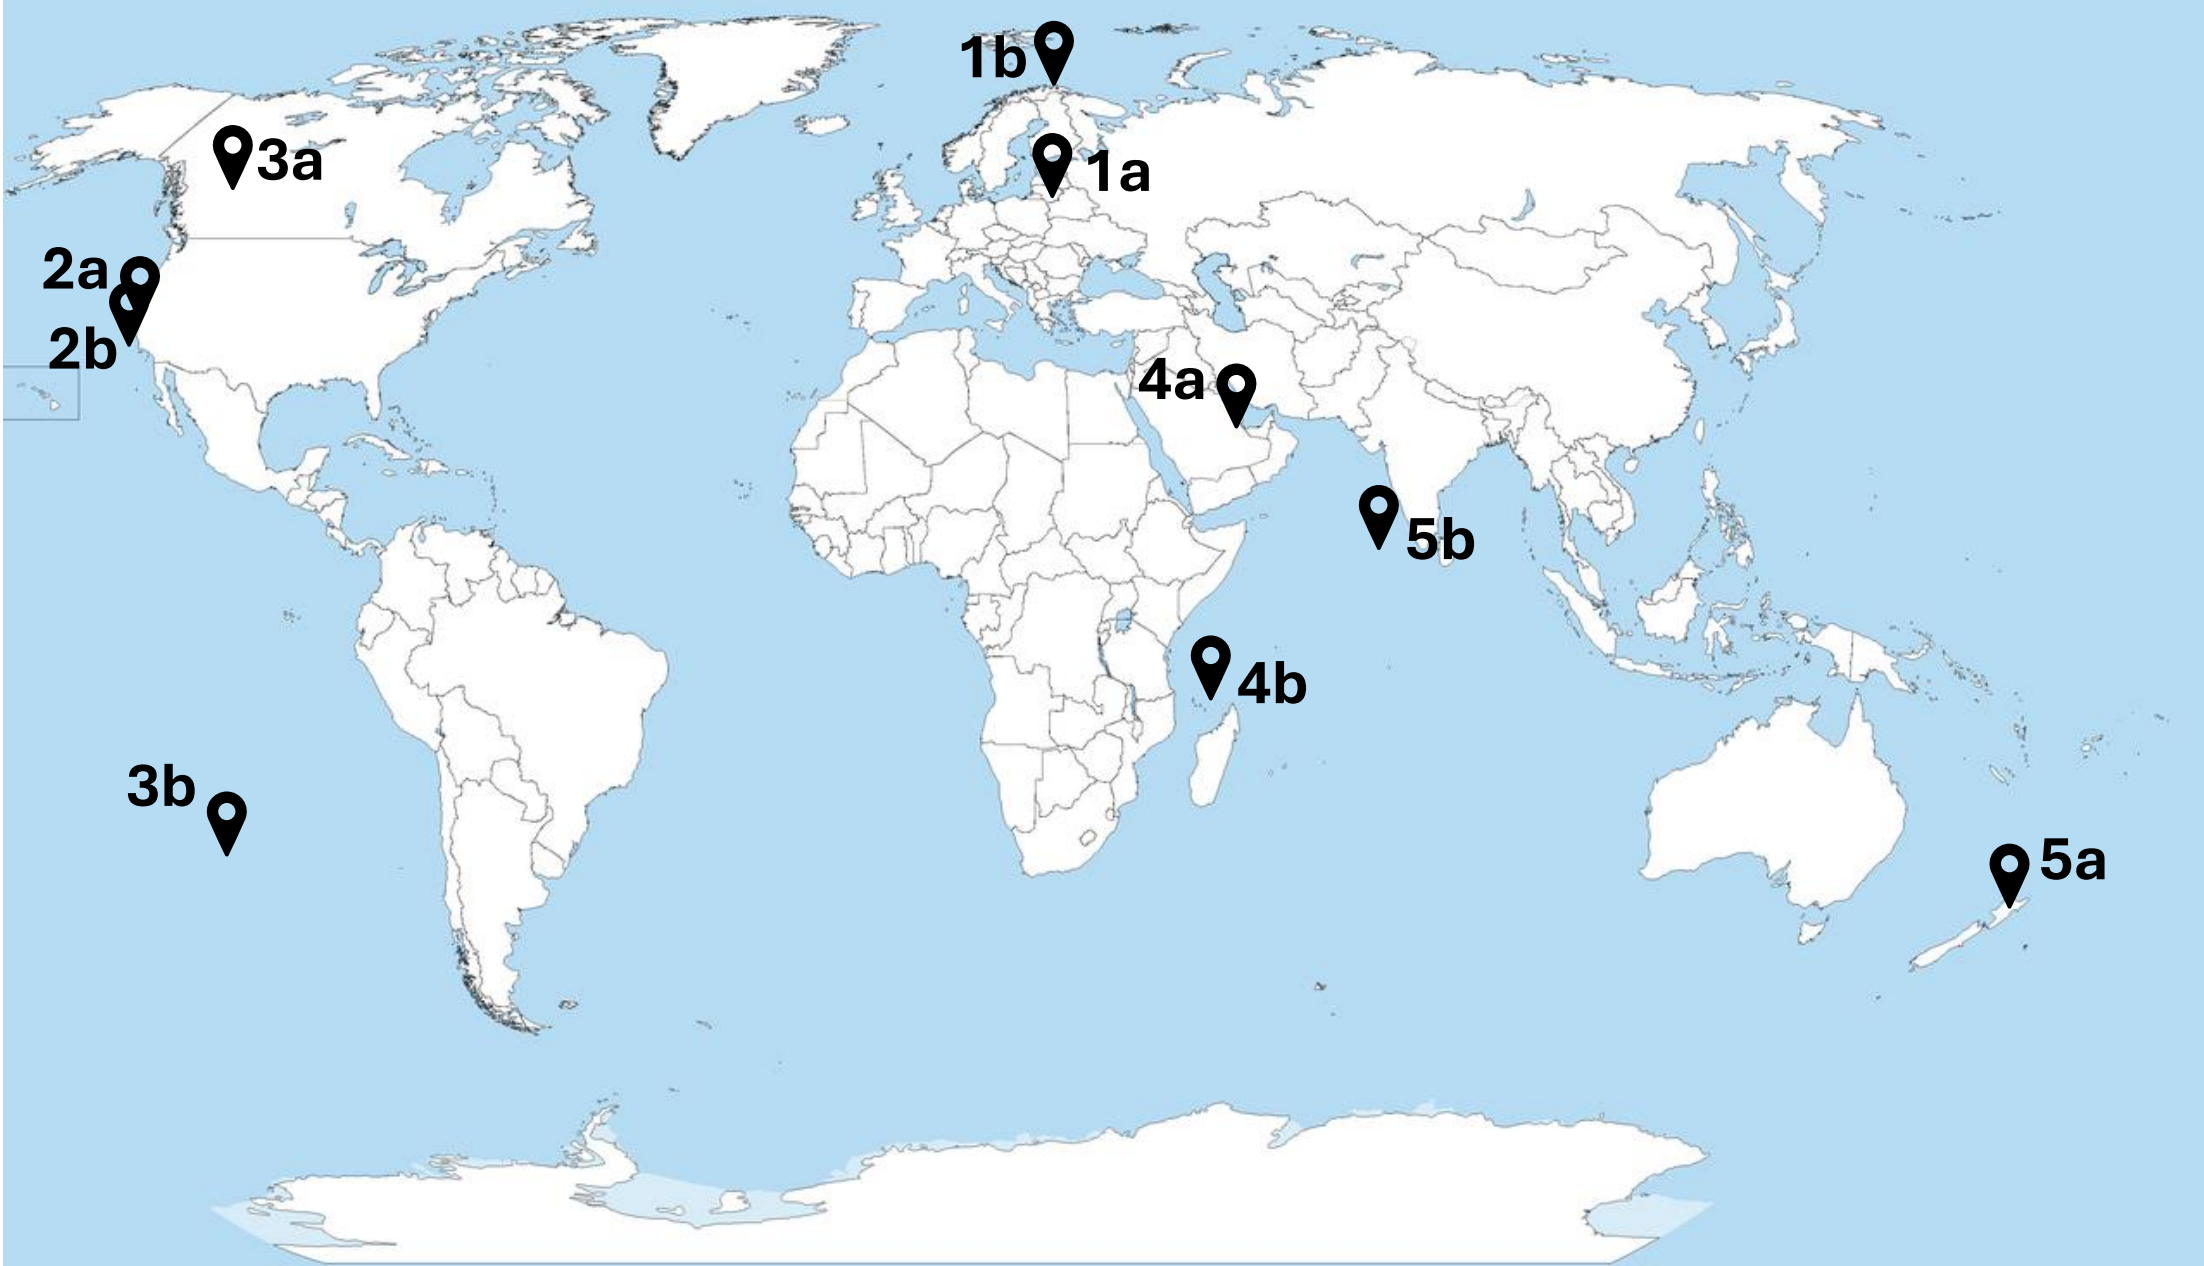

The Global Coherence Monitoring Network magnetometers: 1a. Baisiogala, Lithuania, Eastern Europe; 2a. Boulder Creek, California, USA; 3a. Alberta, Northern Canada; 4a. Hofuf, the eastern region of Saudi Arabia; 5a. Northland, the north island of New Zealand.

The tidal waves measurement stations: 1b. Honningsvag, Norway; 2b. San Francisco, California, USA; 3b. Easter Island, Chile; 4b. Dzaoudzi, France; 5b. Hanimaadhoo, Maldives.
