# Supplementary material for: Tidal Effects on the Schumann Resonance Amplitudes Recorded by the Global Coherence Monitoring System
Source: MDPI journal article supplement (doi:10.3390/app14083332), 2024-04-15
Supplement: s1 [file s1]

$\Delta = 0.3$

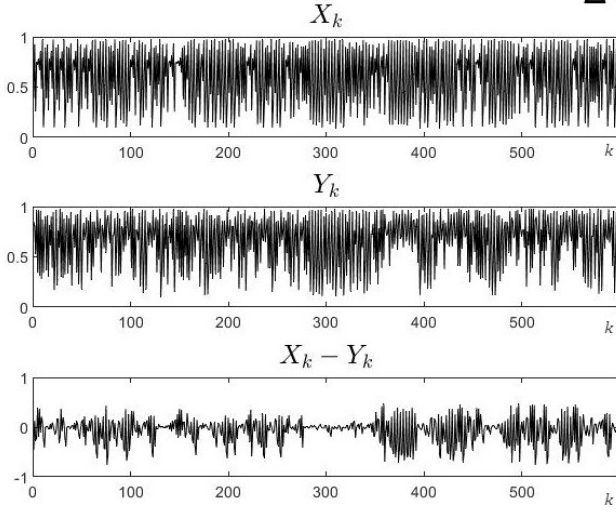

(a)

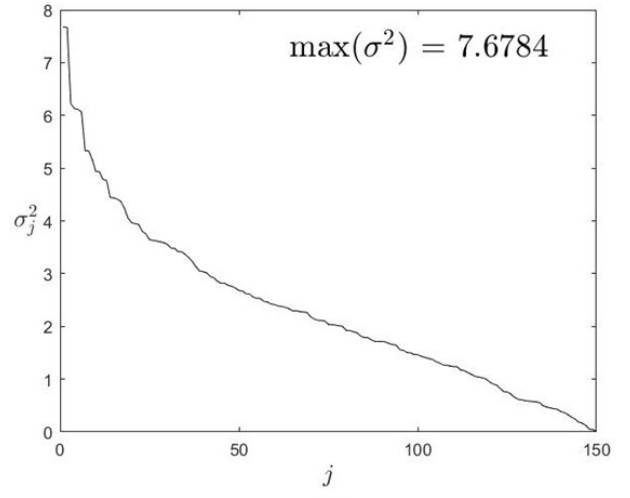

(b)

MSC logistic map at  $\Delta = 0.3$  in panel (a) and  $\sigma^2$  in panel (b)

$\Delta = 0.4$

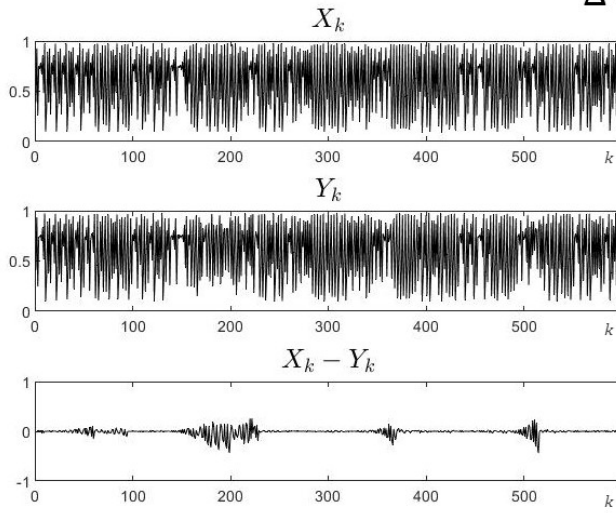

(a)

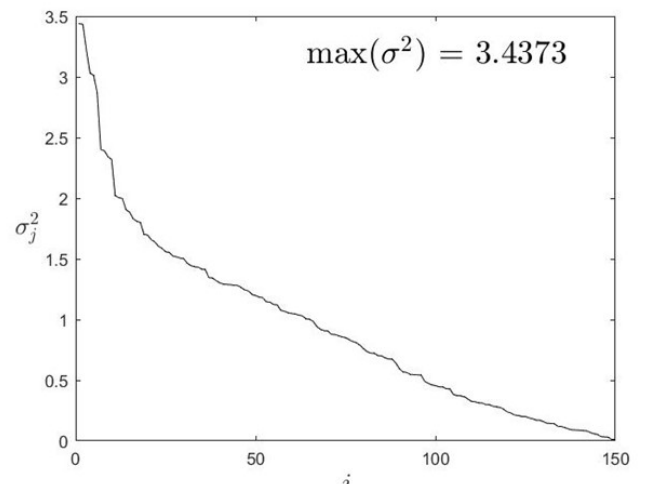

(b)

MSC logistic map at  $\Delta = 0.4$  in panel (a) and  $\sigma^2$  in panel (b)

$\Delta = 0.425$

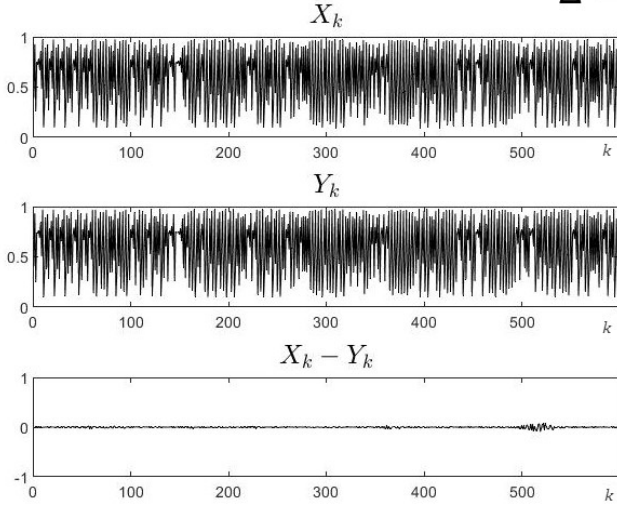

(a)

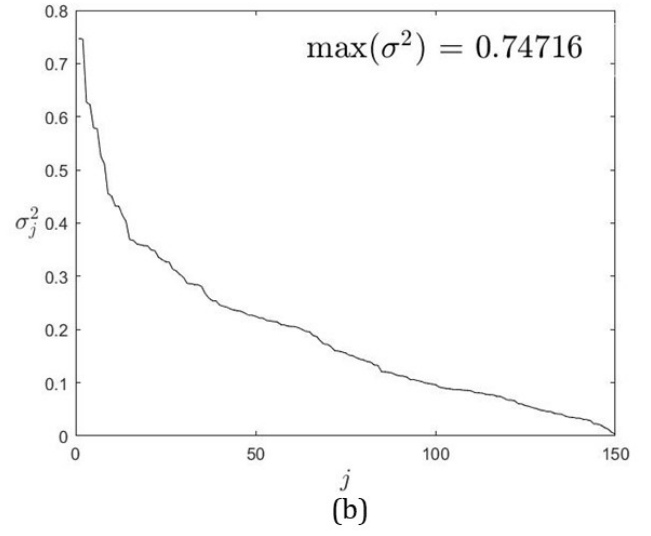

(b)

MSC logistic map at  $\Delta = 0.425$  in panel (a) and  $\sigma^2$  in panel (b)

$\Delta = 0.45$

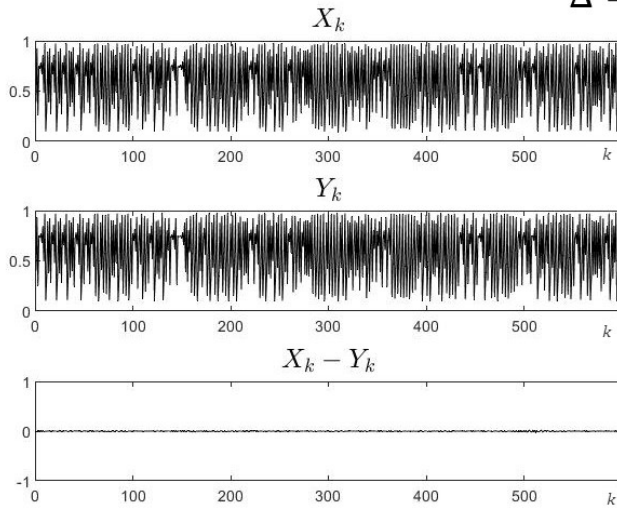

(a)

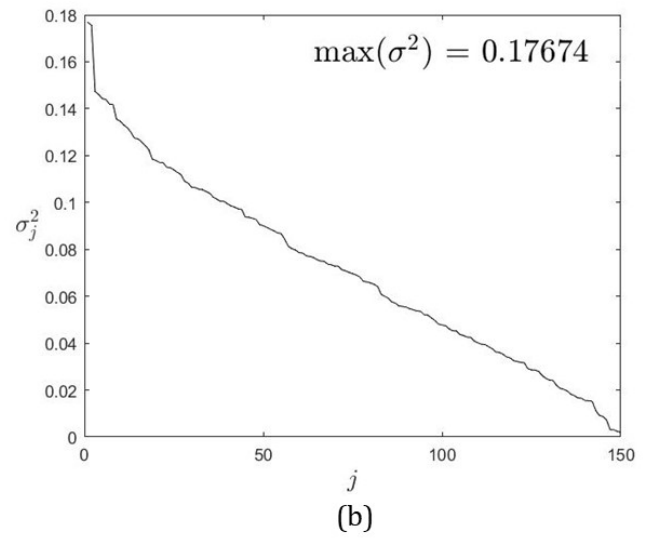

(b)

MSC logistic map at  $\Delta = 0.45$  in panel (a) and  $\sigma^2$  in panel (b)

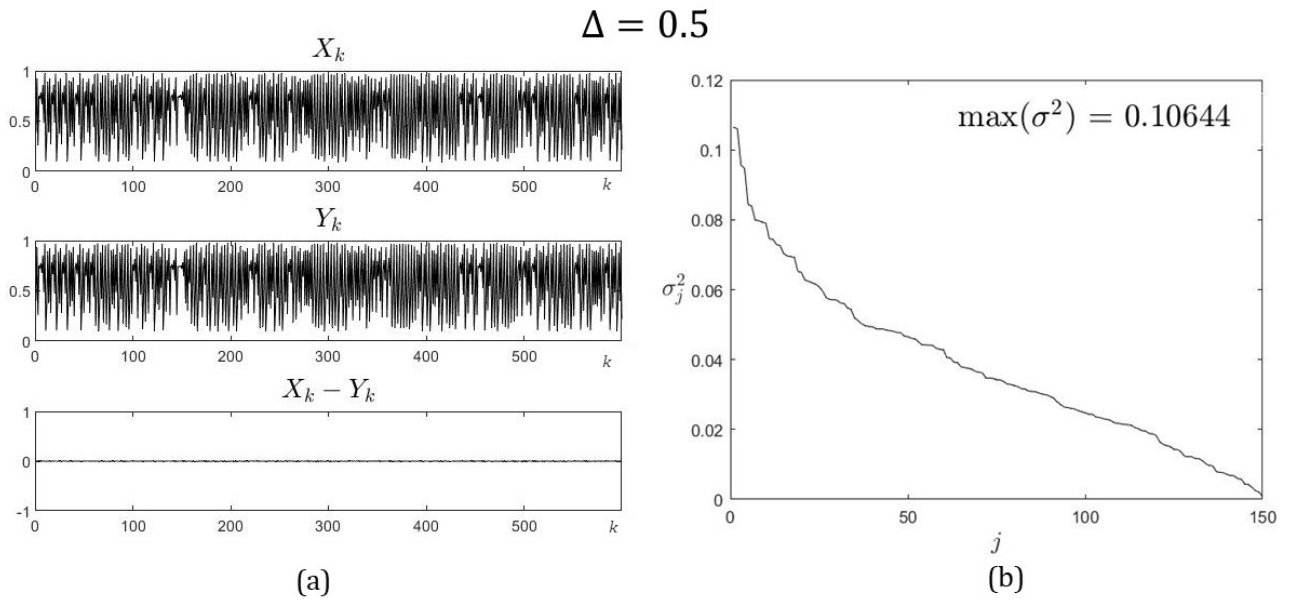

MSC logistic map at  $\Delta = 0.5$  in panel (a) and  $\sigma^2$  in panel (b)
